# Supplementary figures and images for: Nanocapsule-based probe for evaluating the orientation of antibodies immobilized on a solid phase
Source: Royal Society of Chemistry journal article supplement (doi:10.1039/c3an00481c), 2013-01-01

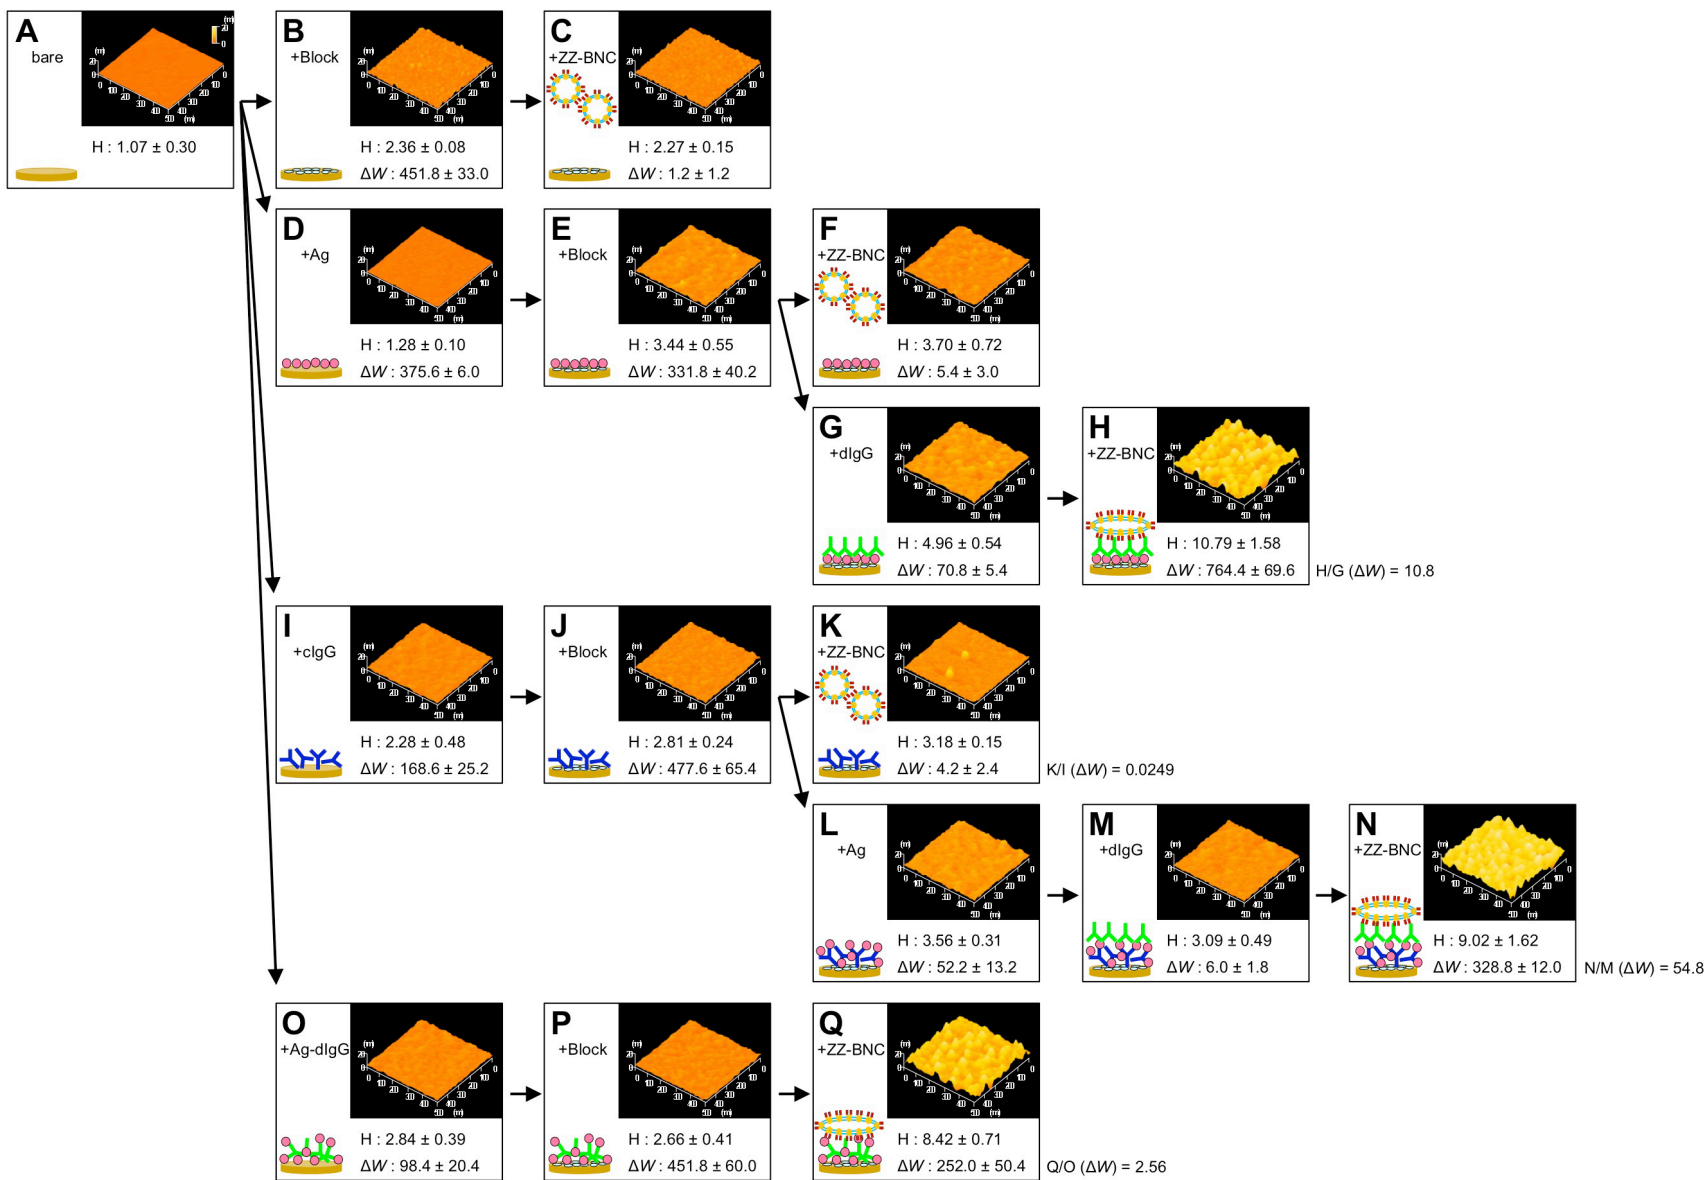

Supplement: c3an00481c.pdf [file c3an00481c.pdf]
